# Supplementary material
Source: PubMed Central journal article supplement (PMC4817235)
Supplement: NIHMS67780-supplement-Methods_S1.pdf [file NIHMS67780-supplement-Methods_S1.pdf]

## METHODS S1

### Cloning and site-directed mutagenesis

All cloning steps and primers are detailed in Table S1.

To generate point mutations, PCR was performed using primers carrying the intended mutation and annealing to the same sequence on opposite strands of the original plasmid template. A 25 $\mu$ l reaction mix [primers (25ng each), template plasmid (50ng), 250 $\mu$ M of dNTPs, Pfu polymerase (1.25U, Promega M7745) and 1X Pfu buffer] was split in two tubes (12.5 $\mu$ l each); one was incubated in a thermocycler [95°C – 3min; (95°C-30s, 55°C-40s, 68°C-2min/kb) x 14] while the other was kept at 4°C. Ten units of DpnI (NEB) were thereafter added to both and incubated at 37°C for 12h prior to bacteria transformation (4 $\mu$ L typically used). Positive clones were always confirmed by sequencing.

### Y2H Assays

Y2H assays were performed as described (Saez *et al.* 2008). The full-length coding sequence of SnRK1 $\alpha$ 1 and the various deletions were cloned into pGADT7 in fusion with the GAL4 activation domain. pGADT7 constructs were faced with pGBKT7 harboring full-length SCE1 fused to the DNA binding domain of GAL4. The empty vectors were used as negative controls.

### *E. coli* heterologous SUMOylation assay

Analyses of SnRK1 SUMOylation in *E. coli* were performed as described with slight modifications (Okada *et al.* 2009). pET28a was used to express potential SUMO targets (SnRK1 $\alpha$ 1 and its truncated and mutant variants, SnRK1 $\beta$ 1, SnRK1 $\beta$ 2, SnRK1 $\gamma$  and SnRK1 $\beta$  $\gamma$ ). BL21(DE3) cells were transformed with pACYCDuet-AtSAE1a-AtSAE2 and selected on 34 $\mu$ g/ml chloramphenicol (Cm) LB Agar plates. 100 $\mu$ l of pACYCDuet-AtSAE1a-AtSAE2 transformed BL21(DE3) competent cells were co-transformed with 30-50ng of pCDFDuet-AtSUMO1/3(AA or GG)-AtSCE1a and pET28a-SnRK1 $\alpha$ 1 (and its truncation and mutation variants)/SnRK1 $\beta$ 1/SnRK1 $\beta$ 2/SnRK1 $\gamma$ /SnRK1 $\beta$  $\gamma$  and then selected on 17 $\mu$ g/mL Cm, 15 $\mu$ g/mL Kanamycin (Kan) and 25 $\mu$ g/mL Spectinomycin (Spec) LB Agar plates. Transformed cells were incubated in 34 $\mu$ g/mL Cm, 30 $\mu$ g/mL Kan and 50 $\mu$ g/mL Spec LB liquid media at 25°C, 200rpm, until Abs<sup>600nm</sup> reached 0.5-0.8. The

expression of recombinant proteins was induced with 0.15mM IPTG (PROMV3955, Promega) at 25 °C for 12h.

For analyzing total soluble proteins, cells were harvested from 3mL cultures and lysed with 100 $\mu$ L of BugBuster Protein Extraction Reagent (Novagen) supplemented with 2 $\mu$ L of ProteoBlock (#R1321, Fermentas), 2 $\mu$ L of Lysozyme (L1667, Sigma) and 2 $\mu$ L of DNase (PROMM6101, Promega). Samples were incubated 20min at RT and cleared by centrifugation (20,000g, 4°C, 25 min). About 100 $\mu$ g of soluble protein (estimated by Abs<sup>280nm</sup>) were subjected to SDS-PAGE and immunoblotting with an anti-T7 antibody.

For analyses from purified proteins, bacteria were pelleted at 4000g for 30min at 4°C, resuspended in Lysis buffer [50mM HEPES-NaOH pH7.25, 0.1M NaCl, antiprotease cOmplete without EDTA (1 tablet/50mL)] and sonicated. After centrifugation (20,000g for 30min at 4°C) the soluble fraction was subjected to IMAC purification (Ni-NTA agarose, Qiagen, 30210). Beads were pre-equilibrated in Lysis buffer and incubated with the soluble protein extract under gentle shaking for 1h at RT. Beads were thereafter washed under gravity flow with Lysis buffer (5 BV, bed volume) and then with 50mM HEPES-NaOH pH7.25 until Abs<sup>230nm</sup> reached 0 or stabilized at less than 0.1. A final wash was applied with 50mM HEPES-NaOH pH7.25, 20mM imidazole. Three consecutive elutions with 50mM HEPES-NaOH pH7.25 supplemented with 100, 200 or 500mM of imidazole were performed during at least 20min at RT under gentle shaking. Eluates were loaded on 30kDa Amicon columns (Millipore) for buffer exchange (to reach a 20mM imidazole concentration) and protein concentration, and were thereafter analyzed (20 $\mu$ g) by SDS-PAGE and immunoblotting with anti-T7.

### Mass spectrometry analyses

For Mass spectrometry analyses of SUMOylated SnRK1 $\alpha$ 1-KD and SnRK1 $\alpha$ 1-RD (using SUMO3-GG or a SUMO3<sup>S91R</sup>-GG variant), 15-30 $\mu$ g of concentrated eluates (see previous section) were resolved on SDS-PAGE (8%), stained with Coomassie Brilliant Blue R250 (VWR: 443283M, 0.2% w/V in 14% Acetic Acid, 14% ethanol), and destained (10% Acetic Acid, 25% ethanol) until the bands were clearly visible. Bands were excised, alkylated with iodoacetamide (carbamidomethylation of cysteines), and digested with trypsin. Eluted peptides were separated by liquid chromatography and detected with an Orbitrap Velos Pro Hybrid Ion Trap Mass Spectrometer (Thermo Scientific). An initial hit

search was done in the NCBI non-redundant database with "Arabidopsis thaliana" as a query organism. Approximately 3400 queries were made for each sample, with peptide mass tolerance  $\pm 3$  ppm and fragment mass tolerance  $\pm 0.8$  Da. For a more refined validation, a micro-database was created containing *in silico* predicted masses of the branched peptides resulting from SUMOylation was compared manually to the data set.

### **Generation of *SnRK1 $\alpha$ 1-GFP*, *SnRK1 $\alpha$ 1 $\Delta$ KA1-GFP* and *SnRK1 $\alpha$ 1-GFP<sub>siz1-2</sub>* and *35S::GFP* lines**

A homozygous insertion line for the *SnRK1 $\alpha$ 1* gene (At3g01090), was identified in the GABI-KAT collection (GABI\_579E09; Figure S3) and was designated as *snrk1 $\alpha$ 1-3* [previously described *snrk1 $\alpha$ 1-1* and *snrk1 $\alpha$ 1-2* mutants are not null (Tsai and Gazzarrini 2012)]. Genotyping was performed using primers *snrk1 $\alpha$ 1-GABIa* and *snrk1 $\alpha$ 1-GABIb* in combination with a left border T-DNA primer (GABI-08409-LB). To determine the T-DNA exact insertion site, a genomic DNA fragment was amplified by PCR with a forward primer binding to the *SnRK1 $\alpha$ 1* locus (*SnRK1 $\alpha$ 1-seqF Fw*) and a reverse primer binding to the T-DNA right border (*GABI1-RB-seq Rv*). Sequencing reactions were subsequently performed on the gel-purified PCR product using the same primers. The T-DNA insertion was mapped to position 2583-2593, immediately before the last exon. The last 11 bases of the intron at the insertion site are missing. The potential presence of a second insertion in the *IMS2* gene (AT5G23020), as annotated in the GABI-Kat site, was ruled out by genotyping with primers *IMS2-Fw* and *IMS2-Rv* in combination with the GABI-08409-LB primer. The absence of SnRK1 $\alpha$ 1 protein in *snrk1 $\alpha$ 1-3* plants was confirmed by immunoblotting with antibodies recognizing epitopes well before the T-DNA insertion, a SnRK1 $\alpha$ 1-specific antibody and an AMPK $\alpha$ -pT172 antibody recognizing the phosphorylated T-loop of SnRK1 $\alpha$ 1 and SnRK1 $\alpha$ 2 [T175 and T176, respectively; (Baena-Gonzalez *et al.* 2007)].

The *pSnRK1 $\alpha$ 1::SnRK1 $\alpha$ 1-GFP::tSnRK1 $\alpha$ 1* and *pSnRK1 $\alpha$ 1::SnRK1 $\alpha$ 1 $\Delta$ KA1-GFP::tSnRK1 $\alpha$ 1* constructs are in the pBm43GW,0 MultiSite Gateway Binary vector (Karimi *et al.* 2005) and the corresponding areas of the gene are indicated in Figure S3A. Both constructs were generated using a pDONR-P4P1R harboring the *SnRK1 $\alpha$ 1* upstream regulatory region (*pSnRK1 $\alpha$ 1*, 2000 bp upstream of the *SnRK1 $\alpha$ 1* start codon in the At3g01090.2 gene model; amplified using primers *PROM-5'UTR\_gSnRK1 $\alpha$ 1 attB4 Fw* and *PROM-5'UTR\_gSnRK1 $\alpha$ 1 attB1r Rv*) and a pDONR-P2RP3 harboring the

SnRK1 $\alpha$ 1 downstream regulatory region (*tSnRK1 $\alpha$ 1*, 1000 bp downstream of the *SnRK1 $\alpha$ 1* stop codon in the At3g01090.2 gene model; amplified using primers TERM-3'UTR\_gSnRK1 $\alpha$ 1 attB2r Fw and TERM-3'UTR\_gSnRK1 $\alpha$ 1 attB3 Rv). In *pSnRK1 $\alpha$ 1::SnRK1 $\alpha$ 1-GFP::tSnRK1 $\alpha$ 1* the middle pDONR221-P1P2 contained the full genomic sequence of *SnRK1 $\alpha$ 1* fused to GFP (primers gSnRK1 $\alpha$ 1-GFP attB1 Fw and gSnRK1 $\alpha$ 1-GFP attB2 Rv), whereas in *pSnRK1 $\alpha$ 1::SnRK1 $\alpha$ 1 $\Delta$ KA1-GFP::tSnRK1 $\alpha$ 1*, it contained the coding sequence of *SnRK1 $\alpha$ 1* truncated at the KA1 domain and fused to GFP (primers gSnRK1 $\alpha$ 1-GFP attB1 Fw and gSnRK1 $\alpha$ 1-GFP attB2 Rv). The *pSnRK1 $\alpha$ 1::SnRK1 $\alpha$ 1-GFP::tSnRK1 $\alpha$ 1* and *pSnRK1 $\alpha$ 1::SnRK1 $\alpha$ 1 $\Delta$ KA1-GFP::tSnRK1 $\alpha$ 1* constructs were introduced into *Agrobacterium tumefaciens* (GV3101) and *snrk1 $\alpha$ 1-3* or *siz1-2* plants were transformed by the floral dip method (Clough and Bent 1998) to generate *pSnRK1 $\alpha$ 1::SnRK1 $\alpha$ 1-GFP::tSnRK1 $\alpha$ 1/snrk1 $\alpha$ 1-3* (referred as *SnRK1 $\alpha$ 1-GFP*), *pSnRK1 $\alpha$ 1::SnRK1 $\alpha$ 1 $\Delta$ KA1-GFP::tSnRK1 $\alpha$ 1/snrk1 $\alpha$ 1-3* (referred as *SnRK1 $\alpha$ 1 $\Delta$ KA1-GFP*), and *pSnRK1 $\alpha$ 1::SnRK1 $\alpha$ 1-GFP::tSnRK1 $\alpha$ 1/siz1-2* (referred as *SnRK1 $\alpha$ 1-GFP<sub>siz1-2</sub>*). BASTA-resistant transformants were selected based on their segregation ratio (T2) and homozygosity (T3). Homozygous T3 or T4 generation transgenic lines were used.

For the generation of plants with constitutive GFP expression (*35S::GFP*), Col-0 plants were transformed with a pBA vector (Duque and Chua 2003) for expression of GFP under the Cauliflower Mosaic Virus 35S promoter.

### Recombinant Protein Production and Purification

Recombinant His- $\Delta$ C ABF2 (residues 1–173) was produced and purified as previously described (Rodrigues *et al.* 2013). Successful protein production and purification was verified by immunoblotting with an anti-T7 antibody.

### Endogenous protein quantification

Leaves of 5-week-old Col-0 and *siz1-2* plants were grounded in liquid nitrogen and resuspended in Buffer C. After two successive centrifugations (20,000g, 4°C, 10min), the supernatant was recovered and filtered (0.45 $\mu$ m), and total protein was quantified using the Bradford protein assay (Bio-Rad; #5000006). Equal protein amounts from the three extracts were solubilized with Laemmli buffer (Laemmli 1970), resolved by SDS-PAGE (8%), transferred to a PVDF membrane at 15V for 1h (semi-dry transfer, Bio-Rad) and immunodetected using antibodies against specific SnRK1 subunits.

### Quantification of immunoblot results

Membranes were analyzed by immunoblotting and then stained with Coomassie Brilliant Blue R250. Band intensity was quantified using Image J (<http://imagej.nih.gov/ij/>) and GelQuantNet (<http://biochemlabsolutions.com/GelQuantNET.html>) softwares. The immunoblot intensities were normalized to the Coomassie staining intensity (referred as “loading”). In Figures 3, 4 and 5 quantifications were normalized to the t=0 of each kinetics or to Col-0 for Figure 3B and C.

### Statistical Analyses

All statistical analyses were performed with the GraphPad Prism 6 software (GraphPad softwares). For analyses of qPCR data, the statistical significance of the indicated changes was assessed employing log<sub>2</sub>-transformed relative expression values (Rieu and Powers 2009).

### Chemicals

Cycloheximide (Sigma, C7698; ethanol stock), MG132 (Sigma, C2211; DMSO stock) and Salicylic Acid (Aldrich: 105910; ethanol stock) solutions were always freshly prepared and used at a final concentration of 100µM, 50µM and 5µM, respectively.

### SUPPLEMENTARY REFERENCES

**Baena-Gonzalez, E., Rolland, F., Thevelein, J.M. and Sheen, J.** (2007) A central integrator of transcription networks in plant stress and energy signalling. *Nature*, **448**, 938-942.

**Clough, S.J. and Bent, A.F.** (1998) Floral dip: a simplified method for Agrobacterium-mediated transformation of *Arabidopsis thaliana*. *Plant J*, **16**, 735-743.

**Duque, P. and Chua, N.H.** (2003) IMB1, a bromodomain protein induced during seed imbibition, regulates ABA- and phyA-mediated responses of germination in *Arabidopsis*. *Plant J*, **35**, 787-799.

**Elrouby, N. and Coupland, G.** (2010) Proteome-wide screens for small ubiquitin-like modifier (SUMO) substrates identify *Arabidopsis* proteins implicated in diverse biological processes. *Proc Natl Acad Sci U S A*, **107**, 17415-17420.

- Karimi, M., De Meyer, B. and Hilson, P.** (2005) Modular cloning in plant cells. *Trends Plant Sci*, **10**, 103-105.
- Laemmli, U.K.** (1970) Cleavage of structural proteins during the assembly of the head of bacteriophage T4. *Nature*, **227**, 680-685.
- Okada, S., Nagabuchi, M., Takamura, Y., Nakagawa, T., Shinmyozu, K., Nakayama, J. and Tanaka, K.** (2009) Reconstitution of *Arabidopsis thaliana* SUMO pathways in *E. coli*: functional evaluation of SUMO machinery proteins and mapping of SUMOylation sites by mass spectrometry. *Plant Cell Physiol*, **50**, 1049-1061.
- Rieu, I. and Powers, S.J.** (2009) Real-time quantitative RT-PCR: design, calculations, and statistics. *Plant Cell*, **21**, 1031-1033.
- Rodrigues, A., Adamo, M., Crozet, P., Margalha, L., Confraria, A., Martinho, C., Elias, A., Rabissi, A., Lumbreras, V., Gonzalez-Guzman, M., Antoni, R., Rodriguez, P.L. and Baena-Gonzalez, E.** (2013) ABI1 and PP2CA Phosphatases Are Negative Regulators of Snf1-Related Protein Kinase1 Signaling in *Arabidopsis*. *Plant Cell*, **25**, 3871-3884.
- Saez, A., Rodrigues, A., Santiago, J., Rubio, S. and Rodriguez, P.L.** (2008) HAB1-SWI3B interaction reveals a link between abscisic acid signaling and putative SWI/SNF chromatin-remodeling complexes in *Arabidopsis*. *Plant Cell*, **20**, 2972-2988.
- Simpson-Lavy, K.J. and Johnston, M.** (2013) SUMOylation regulates the SNF1 protein kinase. *Proc Natl Acad Sci U S A*, **110**, 17432-17437.
- Tsai, A.Y. and Gazzarrini, S.** (2012) AKIN10 and FUSCA3 interact to control lateral organ development and phase transitions in *Arabidopsis*. *Plant J*, **69**, 809-821.

## LEGENDS FOR SUPPLEMENTARY FIGURES

### **Figure S1. SnRK1 $\alpha$ 1 interacts with the SUMO E2 Conjugating Enzyme 1 (SCE1) in a Yeast two-Hybrid assay**

The full-length coding sequence (FL), C-terminal Regulatory Domain (RD) encompassing the KA1 domain, or N-terminal Kinase Domain (KD) of SnRK1 $\alpha$ 1 (represented on the left), were cloned into pGADT7 in fusion with the GAL4 activation domain and co-transfected with pGBKT7 harboring either the GAL4 binding domain alone (empty) or in fusion with the full-length SCE1. The growth of transformed AH109 yeast cells was assessed in permissive [-Leucine (L), -Tryptophan (W)], selective [-L-W,-Histidine (H)], or more stringent [-L-W-H,-Adenine (A)] media. A representative experiment of a minimum of two independent assays is shown.

### **Figure S2. SnRK1 $\gamma$ is SUMOylated in *E. coli* and enriched in *siz1-2*, but is not part of the SnRK1 $\alpha$ 1 complex in *Arabidopsis* leaves**

(a) SnRK1 $\gamma$  subunits containing 6\*His and T7 tags were co-expressed in *E. coli* with SUMO3 together with the SUMO-activating (AtSAE1a/AtSAE2) and SUMO-conjugating

(AtSCE1) enzymes. After production, the protein from total lysate was immunoblotted against its T7 tag. GG and AA refer to conjugatable and non-conjugatable SUMO3 variants, respectively. Black and grey arrowheads mark non-SUMOylated and SUMOylated SnRK1 $\gamma$ , respectively. Equal protein loading is shown by Coomassie Blue (CB) staining of membranes. (b) SnRK1 $\gamma$  accumulates to higher levels in the *siz1-2* mutant. Total leaf protein extracts (10, 17, or 24  $\mu$ g) of Col-0 and *siz1-2* plants were analyzed by Western-blot (WB) using antibodies against SnRK1 $\gamma$ . The signals were quantified and normalized to loading. The average quantification in *siz1-2* normalized to Col-0 is presented. Stars denote statistical significance, as determined by ratio paired *t*-test prior to normalization (n=3; error bars=SEM; \*p<0.05). (c) Anti-GFP immunoprecipitation (IP) of SnRK1 $\alpha$ 1-GFP as in Figure 1b. The presence of SnRK1 $\gamma$  was assessed by immunodetection with SnRK1 $\gamma$  antibodies. Co-immunoprecipitation of SnRK1 $\beta$ 1 was used as a positive control. The input corresponds to the soluble protein extracts that were used for IP. The black arrowheads indicate the SnRK1 subunits.

### Figure S3. Generation of *SnRK1 $\alpha$ 1-GFP* transgenic lines

(a) Structure of the *SnRK1 $\alpha$ 1* gene (At3g01090.2 gene model). All indicated positions have the start codon (noted +1) as a reference. The promoter (2kb upstream of the start codon) and terminator (1 kb downstream of the stop codon) regions used, as well as the kinase and KA1 domains, are indicated. The location of the T-DNA insertion defining the *snrk1 $\alpha$ 1-3* mutant line (GABI-KAT: 579E09) is indicated as well as the position of the three genotyping primers (LP, Left Primer; RP, Right Primer; LB, Left Border; Supplementary Table 1). The sequence providing the exact location of the insertion (2583) is indicated inside the red box ("lost" denotes the 11 bases lost due to the insertion). White boxes correspond to exons. (b) Genotyping PCR using primers LP, RP, and LB, shown in (a). The expected sizes of the two products are indicated on the left (LP: LP-RP reaction, 386bp indicates WT allele; LB: LB-RP reaction, 190bp indicating a mutant allele). (c) Total proteins from adult Arabidopsis leaves of Col-0 or the *snrk1 $\alpha$ 1-3* mutant were analyzed by Western blot (WB) using antibodies against SnRK1 $\alpha$ 1, SnRK1 $\alpha$ 2 or P-AMPK (recognizing the phosphorylated T175/176 of SnRK1 $\alpha$ 1/ $\alpha$ 2, respectively). The black and grey arrowheads indicate phospho-SnRK1 $\alpha$ 1 and phospho-SnRK1 $\alpha$ 2, respectively. (d) Supporting data for Figure 1b. *SnRK1 $\alpha$ 1::GFP* transgenic lines were generated by transformation of the *snrk1 $\alpha$ 1-3* mutant with the pBm43GW,0

MultiSite Gateway Binary vector, containing the promoter (2 kb upstream of the start codon), the genomic coding region (exons-introns) and the terminator (1 kb downstream of the stop codon) of the *SnRK1α1* gene (At3g01090.2; indicated in (a)). Several independent transgenic lines were tested for the presence of SnRK1α1-GFP by Western-blot (WB) using antibodies against SnRK1α1 and GFP. The selected lines (presenting a SnRK1α1 signal close to Col-0) are indicated with arrows. (e) *SnRK1α1ΔKA1::GFP* transgenic lines were generated using the CDS of *SnRK1α1* and analyzed as in (d). (f) Supporting data for Figure 2b. *SnRK1α1::GFP<sub>siz1-2</sub>* transgenic lines were generated by transformation of the *siz1-2* mutant with the pBm43GW,0 MultiSite Gateway Binary construct described in (d). Several transformants were tested for the presence of SnRK1α1-GFP by Western-blot (WB) using antibodies against SnRK1α1 and GFP. The selected lines are indicated with arrows. Equal protein loading in (c-f) is shown by Coomassie Blue (CB) staining of membranes.

#### **Figure S4. SnRKα1 residues found SUMOylated in the *E. coli* assay**

(a) Schematic representation of SnRK1α1 showing the regions referred thereafter. K48 (catalytic phospho-transfer) and T175 (activating T-loop phosphorylation) are the two residues crucial for SnRK1 enzymatic activity later mutated to generate inactive SnRK1α1 variants. The residues predicted [(Elrouby and Coupland 2010); results in (b)], found by MS/MS analyses [from samples shown in (d)], and confirmed to be crucial for SUMOylation in *E. coli* [results in (e and f)] are indicated. Numbering corresponds to gene model At3g01090.1 according to TAIR. (b to f), SUMOylation assay using the Arabidopsis SUMO machinery reconstituted in *E. coli*. The indicated SnRK1α1 variants harboring 6\*His and T7 tags were co-expressed in *E. coli* with the indicated SUMO isoform together with the SUMO-activating (AtSAE1a/AtSAE2) and SUMO-conjugating (AtSCE1) enzymes. GG and AA refer to conjugatable and non-conjugatable SUMO variants, respectively. SUMOylation was assessed by Western-blot using antibodies against the T7-tag. (b) Mutation of predicted SUMOylation sites [“predicted” in (a)]. does not abolish SnRK1α1 SUMOylation. (c) Several residues are SUMOylated in SnRK1α1, as shown by the positive SUMOylation signal with truncated SnRK1α1 variants harboring only the KD or RD. Black and grey arrowheads designate non-SUMOylated and SUMOylated proteins, respectively. (d) SnRK1α1-KD and SnRK1α1-RD samples used to identify the SUMOylated lysine residues [“MS/MS” in (a)]; their relative position in the



predicted SnRK1 structure is also shown]. SnRK1 $\alpha$ 1 was purified *via* the His tag by IMAC and immunoblotted against the T7 tag. Bands corresponding to SUMOylated SnRK1 $\alpha$ 1 (grey arrowhead) were excised and analyzed by MS/MS. RGG denotes mature SUMO3 mutated at the C-terminus (S91R) to generate smaller tryptic peptides more amenable MS/MS analyses. The lysine residues indicated in the table correspond to the ones found to be SUMOylated in MS analyses of SnRK1 $\alpha$ 1-KD and SnRK1 $\alpha$ 1-RD using WT mature SUMO3 (GG) or its RGG variant. The structure of the SnRK1 complex in cartoon representation was modeled with the Swiss model portal using the AMPK structure as a template (2Y94). SnRK1 $\alpha$ 1 is in blue [colored as in (a) with the KA1 domain in dark blue; residues 14 to 395 coupled to a model of the KA1 (Rodrigues *et al.* 2013) from 396 to 512], SnRK1 $\beta$ 1 is in yellow (209-281), and SnRK1 $\beta$  $\gamma$  is in wheat (152-486). SnRK1 $\alpha$ 1 lysine residues found to be SUMOylated by MS/MS [(a), “MS/MS”)] are shown with their sidechains in stick representation in red. The three lysines numbered in red correspond to the three lysines confirmed to be SUMOylated [“confirmed” in (a); see panel (e)]. (e) Same analysis as in (c) on total soluble protein extract from bacteria expressing the indicated SnRK1 $\alpha$ 1 domains mutated or not for the shown lysines. An area pointed out with a blue arrowhead indicates where the SUMOylated protein should be in the mutated variant (compare to grey arrowhead in the WT control of the same panel). (f) Validation of the mutational analysis in (e) using affinity-purified protein from bacteria expressing a full length SnRK1 $\alpha$ 1 mutated or not for the three confirmed lysines (K34/63/390). KD, Kinase domain; RD, Regulatory Domain; KA1, Kinase Associated 1 domain; UBA, Ubiquitin-Associated domain. Equal protein loading in (e-f) is shown by Coomassie Blue (CB) staining of membranes.

### Figure S5. Salicylic acid (SA) has no effect on SnRK1 signaling

(a) SA does not alter SnRK1 reporter gene induction in protoplasts. The *pDIN6::LUC* reporter for SnRK1 signaling is strongly induced by SnRK1 $\alpha$ 1 expression, but this induction is similar in mock- and SA-treated cells. Protoplasts were transfected with a plasmid expressing SnRK1 $\alpha$ 1 or control DNA, incubated for 4h and thereafter treated with SA (5 $\mu$ M) or ethanol (mock control) and the t0 was collected. After 2h or 15h the cells were collected for luciferase activity assays and western-blot (WB). Equal protein loading in (e-f) is shown by Coomassie Blue (CB) staining of membranes. Data presented are means and error bars are SEM (n=3). (b) Various SA treatments induce the

expression of two marker genes of Systemic Acquired Resistance (SAR; *PR1*, At2g14610 and *PR5*, At1g75040), but not the induction of the SnRK1 marker genes *DIN6* (At3g47340), *AXP* (At2g33830), and *TPS8* (At1g70290). The data are from four independent studies and were obtained by using Genevestigator (<https://genevestigator.com/gv/>).

### Figure S6. Specificity of the anti-SnRK1 $\beta\gamma$ antibody

Several SnRK1 $\beta\gamma$ -containing protein preparations were used to assess the specificity of the antibody (Agrisera AS09 463) in western-blot ("WB"). The antibody recognized the recombinant protein produced in *E. coli* ("His-SnRK1 $\beta\gamma$ ", presented in Figure 1a) and the HA-tagged protein overexpressed in protoplasts ("SnRK1 $\beta\gamma$ -HA"). This antibody was also able to recognize SnRK1 $\beta\gamma$  from SnRK1 $\alpha1$  immunoprecipitation ("IP-SnRK1 $\alpha1$ "). However, this antibody fails to recognize SnRK1 $\beta\gamma$  in crude extracts ("CE"), where only unspecific bands of higher or smaller molecular weight are detected. Arrowhead indicates SnRK1 $\beta\gamma$ .

### Figure S7. Conservation in SnRK1 $\alpha1$ of the residues implicated in SNF1 SUMOylation

(a) Partial ClustalW alignment of the  $\alpha$ -subunits of SnRK1 ( $\alpha1/\alpha2$  from Arabidopsis), AMPK ( $\alpha1/\alpha2$  from Human), and SNF1 (*S. cerevisiae*). The two partially overlapping SIMs from SNF1 (Simpson-Lavy and Johnston 2013) are boxed. Only SIM1 (black box, containing I128, pointed) was shown to be important for the inhibition of Snf1 by SUMOylation. (b) Structural alignment of the KA1 domain from Arabidopsis SnRK1 $\alpha1$  [model, pale green, (Rodrigues *et al.* 2013)] and the crystal structure of SNF1 (light blue, PDB: 2QVLA: 506-591). RMS=0.45Å (69 to 69 atoms) generated by Pymol.
